# Supplementary material for: A highly transparent ionogel with strength enhancement ability for robust bonding in an aquatic environment
Source: Royal Society of Chemistry journal article supplement (doi:10.1039/d1mh00461a), 2021-01-01
Supplement: d1mh00461a6.pdf [file d1mh00461a6.pdf]

## Supporting Information

# A Highly Transparent Ionogel with Strength Enhancement Ability for Robust Bonding in Aquatic Environment

*Zhenchuan Yu, Peiyi Wu\**

*State Key Laboratory for Modification of Chemical Fibers and Polymer Materials, College of Chemistry, Chemical Engineering and Biotechnology, Center for Advanced Low-Dimension Materials, Donghua University Shanghai 201620, P. R. China. E-mail: wupeiyi@dhu.edu.cn*

*State Key Laboratory of Molecular Engineering of Polymers, Department of Macromolecular Science and Laboratory of Advanced Materials, Fudan University, Shanghai 200433, PR China. E-mail: peiyiwu@fudan.edu.cn*

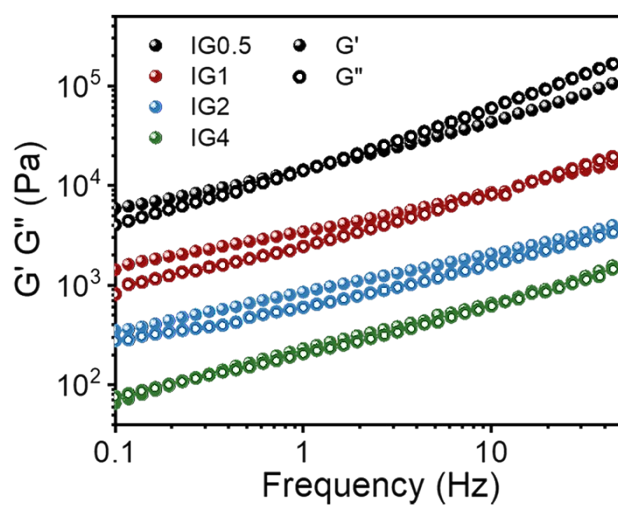

**Fig. S1.** Frequency dependencies of the storage ( $G'$ ) and loss ( $G''$ ) moduli of the IGs.

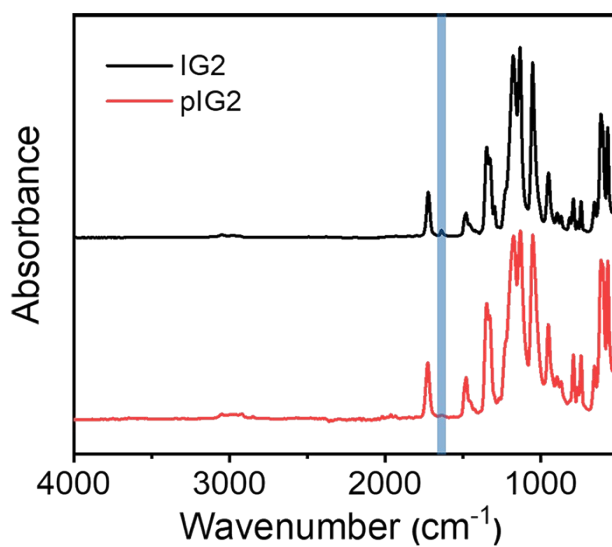

**Fig. S2.** FTIR spectra of IG2 and pIG2.

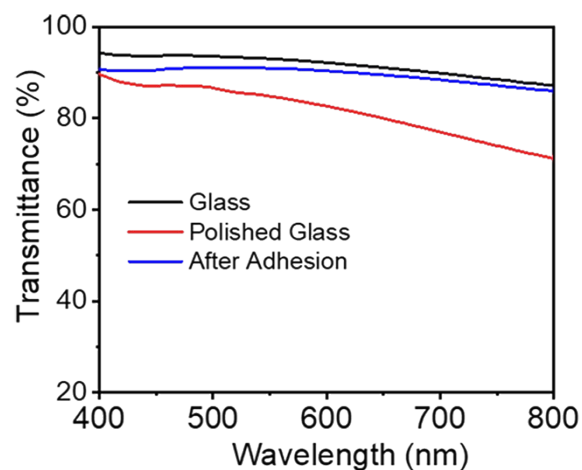

**Fig. S3.** The transmittance of glass, polished glass and the polished glass after bonding with IG2.

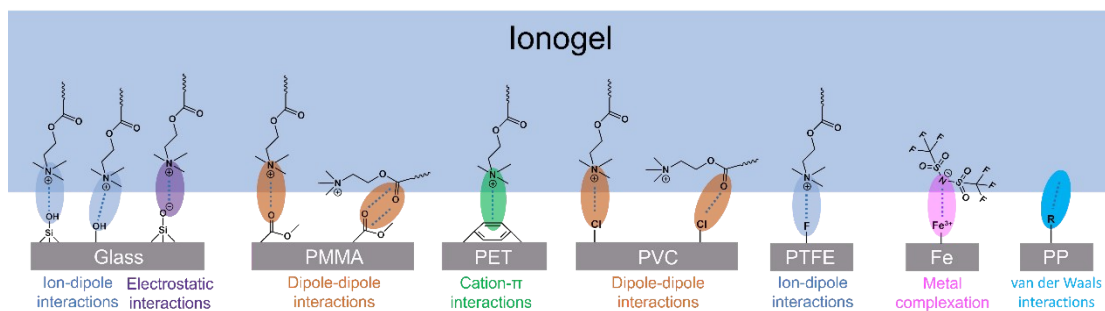

**Fig. S4.** The possible adhesion mechanisms between the ionogel and different substrates.

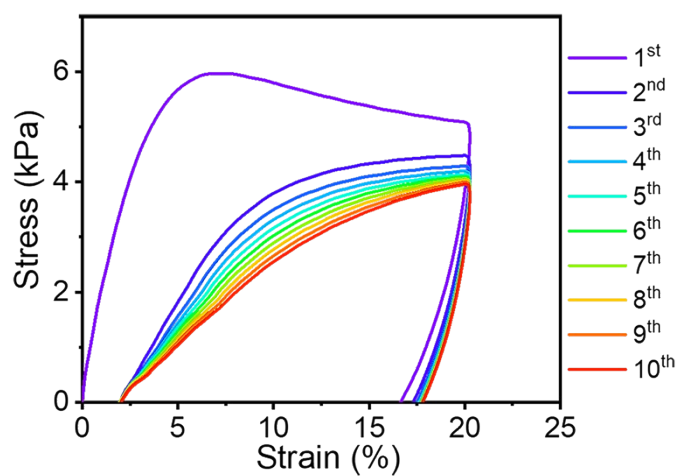

**Fig. S5.** Stress-strain curves of the pIG2-N0.4 under cyclic loading in the strain ranges of 20%.

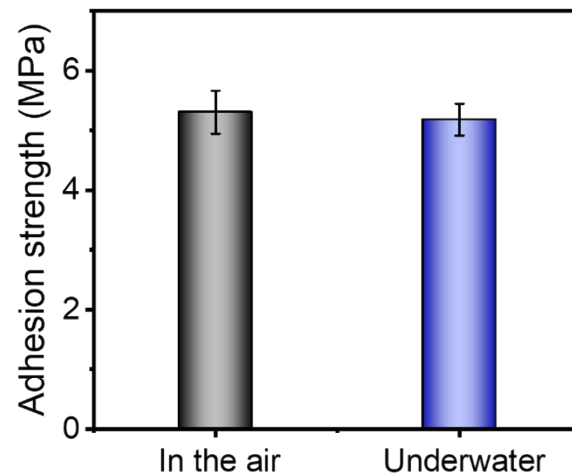

**Fig. S6.** The adhesion strength of pIG2-N0.4 for glasses in the air and underwater.

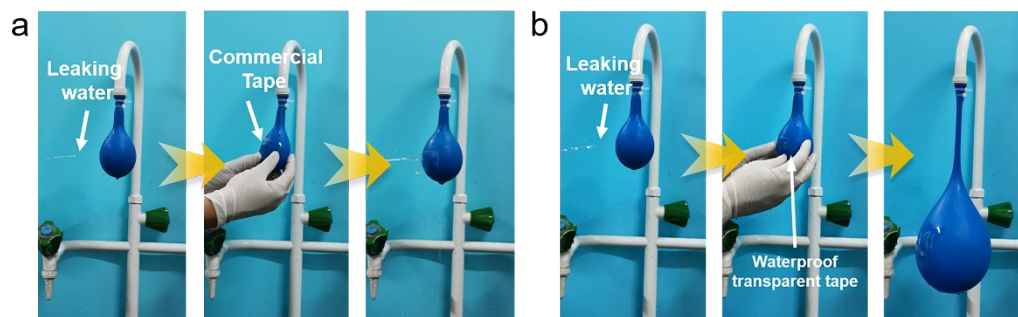

**Fig. S7.** The adhesion ability of (a) commercial tape and (b) WTT in wet environment.

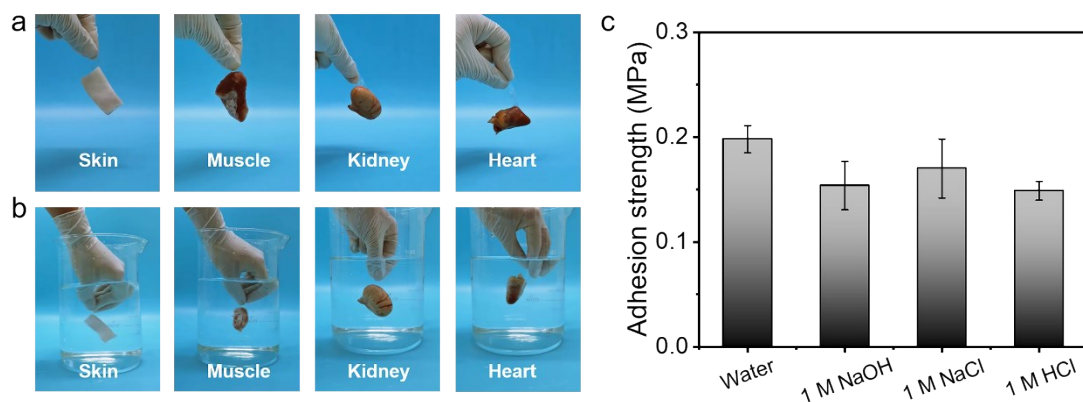

**Fig. S8.** Digital picture of adhesion ability of WTT for different tissues a) in the air and b) underwater. c) The adhesion strength of WTT to porcine skin in different environment.

**Supporting Video S1.** The underwater adhesion ability of ionogels.

**Supporting Video S2.** Adhered glasses can bear the weight of an adult (~68 kg) and allow the adult to move up and down.

**Supporting Video S3.** Commercial transparent tapes can't stop rubber balloon from leaking water.

**Supporting Video S4.** WTT can effectively adhere to rubber balloon without being affected by the wet environment and the rushing current.

**Supporting Video S5.** WTT has repair capability underwater.
